# Supplementary material for: Non-canonical BAD activity regulates breast cancer cell and tumor growth via 14-3-3 binding and mitochondrial metabolism
Source: PubMed Central journal article supplement (PMC6756016; doi:10.1038/s41388-018-0673-6), 2019-01-11
Supplement: 41388_2018_673_MOESM5_ESM.pdf [file 41388_2018_673_MOESM5_ESM.pdf]

## SUPPLEMENTAL FIGURE 4

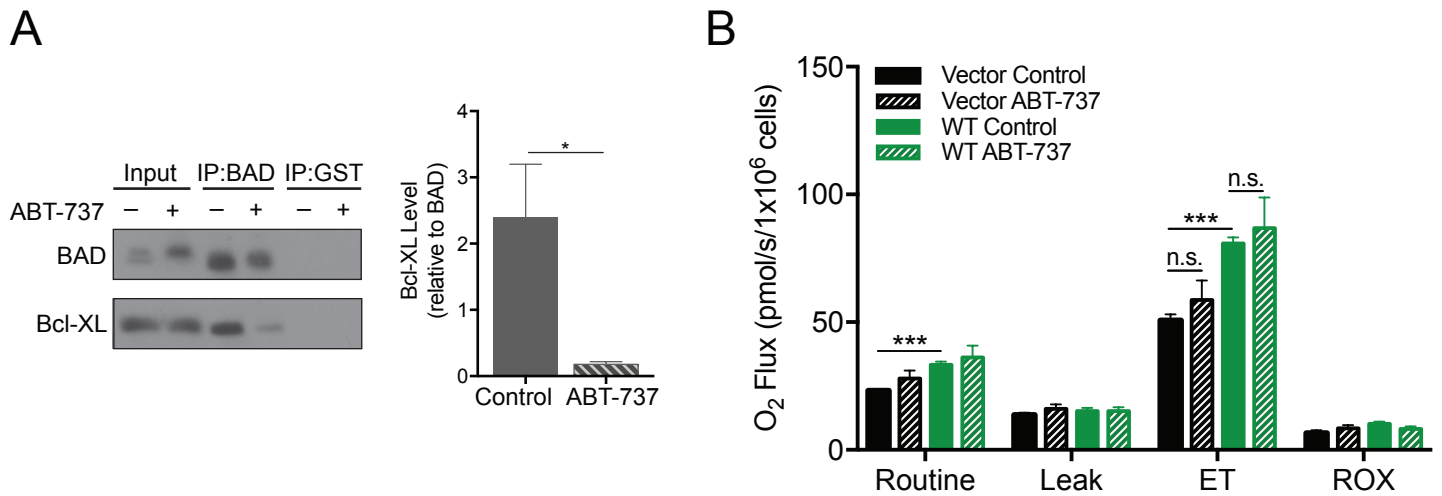

### Supplementary Figure 4. The BAD:Bcl-XL interaction is not required for BAD mediated mitochondrial metabolism

(A) Left: MDA-MB-231 cells expressing wild-type BAD were incubated with 20  $\mu$ m ABT-737 for 24 hours prior to immunoprecipitation with BAD antibody to confirm Bcl-XL inhibition. Right: Quantification of Bcl-XL binding to BAD (error bars  $\pm$  SEM of 3 independent experiments). (B) MDA-MB-231 cells expressing pcDNA3.2-V5-DEST vector control or wild-type BAD were grown for 48 hours in normal growth medium prior to 24 hour addition of 20  $\mu$ m ABT-737. Cells were then subjected to high resolution respirometry (error bars  $\pm$  SEM of 4 independent experiments).
