# Supplementary material for: Non-canonical BAD activity regulates breast cancer cell and tumor growth via 14-3-3 binding and mitochondrial metabolism
Source: PubMed Central journal article supplement (PMC6756016; doi:10.1038/s41388-018-0673-6), 2019-01-11
Supplement: 41388_2018_673_MOESM6_ESM.pdf [file 41388_2018_673_MOESM6_ESM.pdf]

## SUPPLEMENTAL FIGURE 5

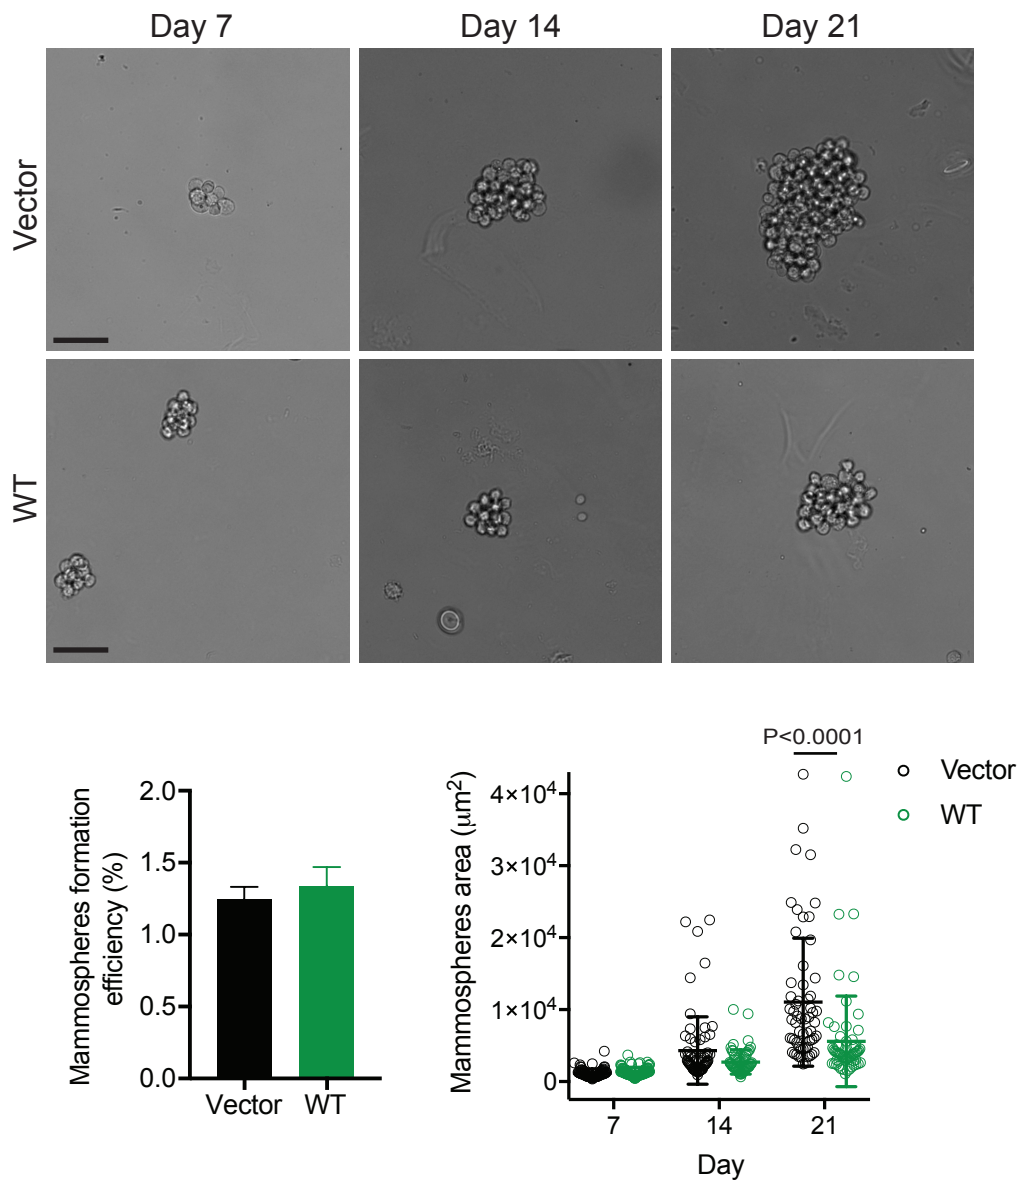

### Supplemental Figure 5. BAD expression decreases mammosphere size

MDA-MB-231 vector and wild-type BAD single cells were grown in medium allowing for growth of mammospheres. Images were taken at the indicated day. Scale bar=50  $\mu\text{m}$ . Mammosphere formation efficiency was measured on day 21 (error bars indicate SEM). Mammosphere area was measured on day 7, 14 and 21 (Two-way ANOVA followed by Sidak's multiple comparisons test).
